# Supplementary material for: Automating crystallographic structure solution and refinement of protein–ligand complexes
Source: PubMed Central journal article supplement (PMC3919266; doi:10.1107/s139900471302748x), 2013-12-25
Supplement: d-70-00144-sup1.pdf [file d-70-00144-sup1.pdf]

## Supplementary Material

**Supplementary Table S1.** Selected structures from the Iridium test set arranged by protein. The Ligand column gives the Chemical Component Dictionary (Henrick *et al.*, 2008) code for the ligand to be placed by *phenix.ligand\_pipeline*. (\* 1OF6 contains DTY in the deposited model, but the chemical entity is clearly TYR.)

| Protein                                                 | PDB ID | d <sub>min</sub> (Å) | Ligand | Reference                          |
|---------------------------------------------------------|--------|----------------------|--------|------------------------------------|
| Influenza neuraminidase                                 | 1B9V   | 2.35                 | RA2    | Finley <i>et al.</i> , 2000        |
| Ricin                                                   | 1BR6   | 2.30                 | PT1    | Yan <i>et al.</i> , 1997           |
| Cyclooxygenase-2 (COX-2)                                | 1CX2   | 3.00                 | S58    | Kurumbail <i>et al.</i> , 1996     |
|                                                         | 4COX   | 2.90                 | IMN    |                                    |
|                                                         | 1OQ5   | 1.50                 | CEL    | Weber <i>et al.</i> , 2004         |
| Retinoic acid nuclear receptor gamma-1                  | 1EXA   | 1.59                 | 394    | Klaholz <i>et al.</i> , 2000a      |
| Retinoic acid nuclear receptor gamma-2                  | 1FCX   | 1.47                 | 184    | Klaholz <i>et al.</i> , 2000b      |
|                                                         | 1FCZ   | 1.38                 | 156    |                                    |
| Factor Xa                                               | 1FJS   | 1.92                 | Z34    | Adler <i>et al.</i> , 2000         |
|                                                         | 1MQ6   | 2.10                 | XLD    | Adler <i>et al.</i> , 2002         |
| Hemoglobin                                              | 1G9V   | 1.85                 | RQ3    | Safo <i>et al.</i> , 2001          |
| <i>T. vivax</i> nucleoside hydrolase                    | 1HP0   | 2.10                 | AD3    | Versees <i>et al.</i> , 2001       |
| 6-hydroxymethyl-7,8-dihydropterin pyrophosphokinase     | 1HQ2   | 1.25                 | PH2    | Blaszczyk <i>et al.</i> , 2003     |
| HMG-CoA reductase                                       | 1HWI   | 2.30                 | 115    | Istvan & Deisenhofer, 2001         |
| alpha-mannosidase II                                    | 1HWW   | 1.87                 | SWA    | van den Elsen <i>et al.</i> , 2001 |
| Tryptophan synthase                                     | 1K3U   | 1.70                 | IAD    | Weyand <i>et al.</i> , 2002        |
| AmpC beta-lactamase                                     | 1L2S   | 1.94                 | STC    | Powers <i>et al.</i> , 2002        |
| Triosephosphate isomerase                               | 1ML1   | 2.60                 | PGA    | Thanki <i>et al.</i> , 1997        |
| Protein farnesyltransferase-geranylgeranyltransferase-I | 1MZC   | 2.00                 | BNE    | deSolms <i>et al.</i> , 2003       |
| Pantothenate synthetase                                 | 1N2J   | 1.80                 | PAF    | Wang & Eisenberg, 2003             |

|                                                      |      |      |      |                                 |
|------------------------------------------------------|------|------|------|---------------------------------|
| HSV1 thymidine kinase                                | 1OF1 | 1.95 | SCT  | Schelling <i>et al.</i> , 2004  |
|                                                      | 1QHI | 1.90 | BPG  | Bennett <i>et al.</i> , 1999    |
| 3-deoxy-D-arabino-heptulosonate-7-phosphate synthase | 1OF6 | 2.10 | TYR* | König <i>et al.</i> , 2004      |
| JNK3                                                 | 1PMN | 2.20 | 984  | Scapin <i>et al.</i> , 2003     |
| <i>P. falciparum</i> Purine nucleoside phosphorylase | 1Q1G | 2.02 | MTI  | Shi <i>et al.</i> , 2004        |
| GSK-3beta                                            | 1Q41 | 2.10 | IXM  | Bertrand <i>et al.</i> , 2003   |
| Cytochrome P450 2C9                                  | 1R9O | 2.00 | FLP  | Wester <i>et al.</i> , 2004     |
| GluR6 ligand-binding domain                          | 1TT1 | 1.93 | KAI  | Mayer, 2005                     |
| Cdc42-associated tyrosine kinase ACK1                | 1U4D | 2.10 | DBQ  | Lougheed <i>et al.</i> , 2004   |
| CDK25                                                | 1UNL | 2.20 | RRC  | Mapelli <i>et al.</i> , 2005    |
| Cyclic dipeptide chitinase                           | 1W1P | 2.10 | GIO  | Houston <i>et al.</i> , 2004    |
| <i>M. tuberculosis</i> thymidylate kinase            | 1W2G | 2.10 | THM  | Fioravanti <i>et al.</i> , 2005 |
| Anthrax lethal factor                                | 1YQY | 2.30 | 915  | Shoop <i>et al.</i> , 2005      |
| Myosin II                                            | 1YV3 | 2.00 | BIT  | Allingham <i>et al.</i> , 2005  |
| Acetylcholinesterase                                 | 2ACK | 2.40 | EDR  | Ravelli <i>et al.</i> , 1999    |
| Chk1                                                 | 2BR1 | 2.00 | PFP  | Foloppe <i>et al.</i> , 2005    |

**Supplementary Table S2.** Run times in seconds of individual tasks for three representative structures from the Iridium test set for which *phenix.ligand\_pipeline* ran to completion and correctly placed all copies of the ligand in the asymmetric unit. The system used for benchmarking was a 64-core 1.4Ghz AMD Opteron 6376 running Fedora Linux 19. All tasks were run as integrated into *phenix.ligand\_pipeline*. The equivalent standalone functionality in *Phenix* is listed below each task. The number of non-hydrogen (*i.e.* heavy) atoms in the structure is given below each PDB ID to provide some sense of relative size. Tasks for which the use of multiple CPUs was beneficial are bolded.

| Task                                                                                          | <b>1BR6</b><br>(nproc=1)<br>2,163 | <b>1BR6</b><br>(nproc=16)<br>2,163 | <b>1OF1</b><br>(nproc=1)<br>5,099 | <b>1TT1</b><br>(nproc=1)<br>4,652 |
|-----------------------------------------------------------------------------------------------|-----------------------------------|------------------------------------|-----------------------------------|-----------------------------------|
| Data input                                                                                    | 0.1                               | 0.1                                | 0.5                               | 0.6                               |
| Data assessment<br>( <i>phenix.xtriage</i> )                                                  | 1.4                               | 1.5                                | 13                                | 7                                 |
| Molecular replacement<br>( <i>phenix.phaser</i> )                                             | 47                                | 48                                 | 156                               | 78                                |
| Ligand parameterization<br>( <i>phenix.elbow</i> )                                            | 64                                | 68                                 | 113                               | 22                                |
| Sidechain truncation, water removal, and omit map calculation<br>( <i>mmtbx.prune_model</i> ) | 12                                | 12                                 | 78                                | 47                                |
| <b>Ligand fitting</b><br>( <i>phenix.ligandfit</i> )                                          | 270                               | 91                                 | 1,599                             | 2,596                             |
| <b>Refinement</b> <sup>*</sup><br>( <i>phenix.refine</i> )                                    | 2,881                             | 1521                               | 12,021                            | 7,197                             |
| Validation<br>(Comprehensive validation –<br><i>Phenix</i> GUI)                               | 88                                | 91                                 | 431                               | 270                               |
| Total                                                                                         | 3365                              | 1835                               | 14420                             | 10224                             |

<sup>\*</sup>Sum of run times for two separate jobs – one before and one after ligand fitting. As run with default settings, only the second job uses multiple CPU cores (12-16 at a time in the target weight optimization grid search).
